# Supplementary material for: Ni nanotube array-based electrodes by electrochemical alloying and de-alloying for efficient water splitting
Source: Royal Society of Chemistry journal article supplement (doi:10.1039/c8nr02238k), 2018-01-01
Supplement: c8nr02238k1.pdf [file c8nr02238k1.pdf]

# Supporting Information

## Ni nanotube array-based electrodes by electrochemical alloying and de-alloying for efficient water splitting

Xue Teng,<sup>1</sup> Jianying Wang,<sup>1</sup> Lvlv Ji,<sup>1</sup> Yaokang Lv<sup>2</sup> and Zuofeng Chen\*<sup>1</sup>

<sup>1</sup>Shanghai Key Lab of Chemical Assessment and Sustainability, School of Chemical Science and Engineering, Tongji University, 1239 Siping Road, Shanghai 200092, China; <sup>2</sup>College of Chemical Engineering and Materials Science, Zhejiang University of Technology, Hangzhou 310014, China.

\*zfchen@tongji.edu.cn (Z.-F. C.)

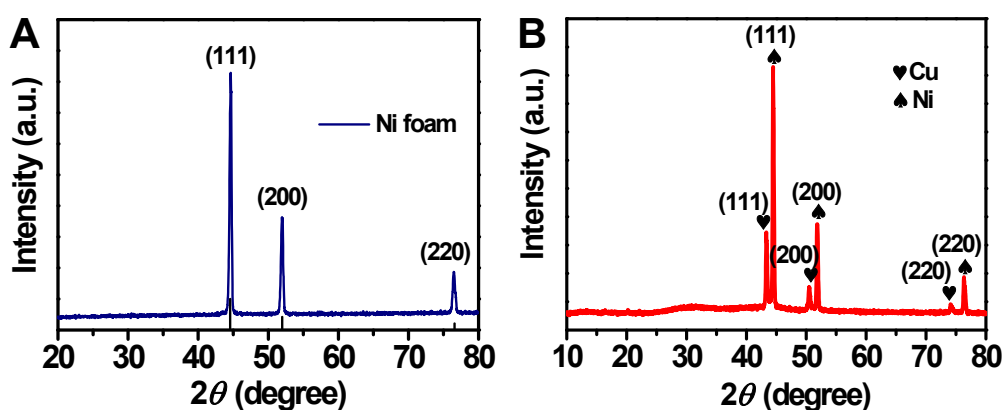

**Figure S1.** (A) XRD pattern of the bare Ni foam. (B) XRD pattern of NiCu alloy scraped from the FTO substrate.

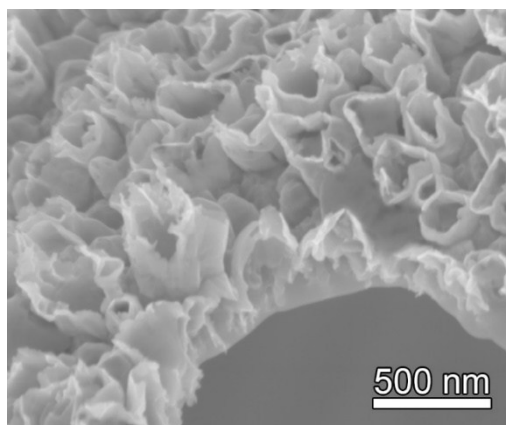

**Figure S2.** The cross-sectional SEM image of Ni NTAs.

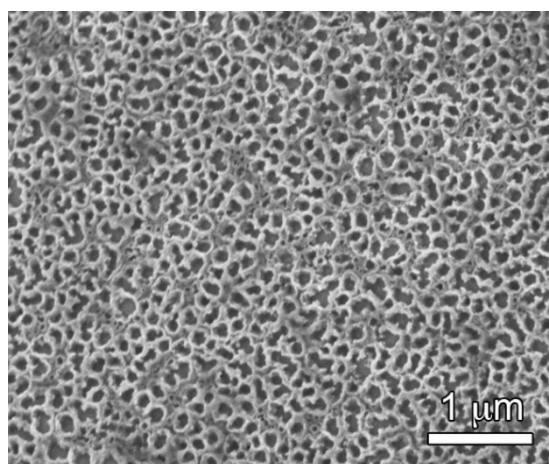

**Figure S3.** SEM images of Ni NTAs synthesized by 5 min cathodic electrodeposition in 0.05 M CuSO<sub>4</sub> solution.

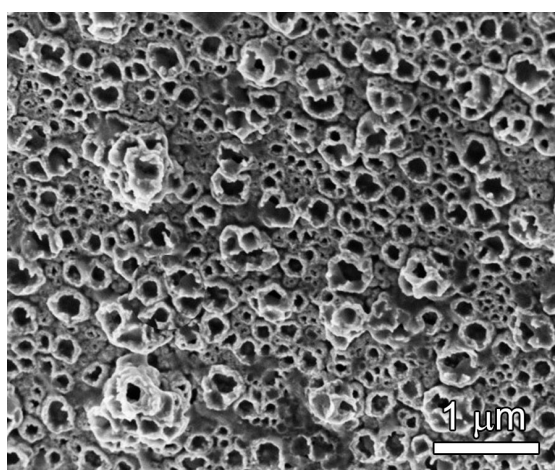

**Figure S4.** SEM images of Ni NTAs synthesized by 8 min cathodic electrodeposition in 0.1 M CuSO<sub>4</sub> solution.

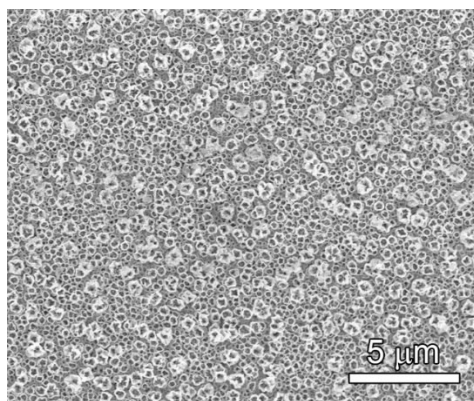

**Figure S5.** SEM image of Ni NTAs at an FTO substrate.

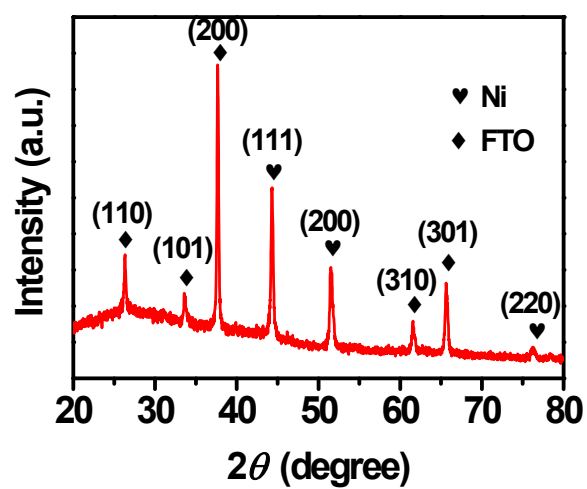

**Figure S6.** XRD pattern of Ni NTAs at an FTO substrate.

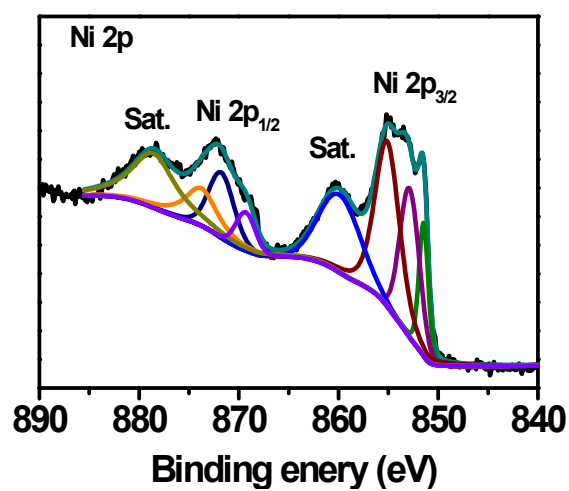

**Figure S7.** Ni 2p XPS of Ni NTAs at an FTO substrate.

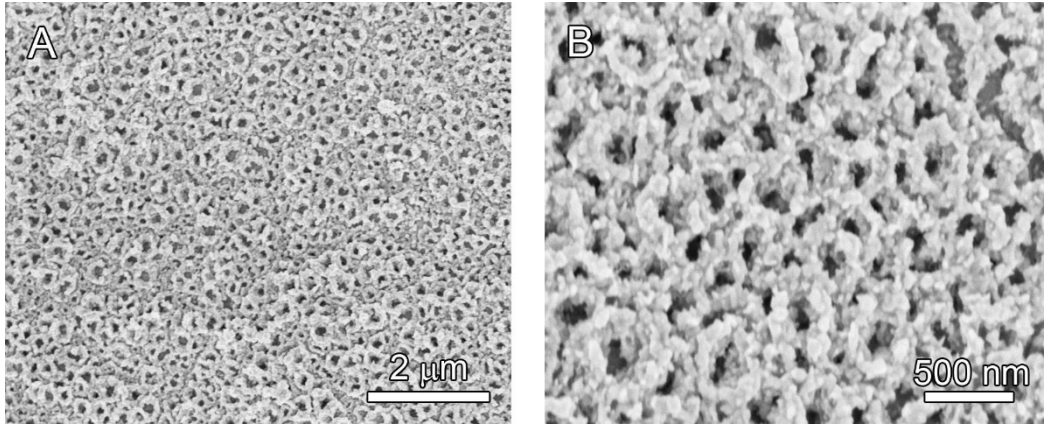

**Figure S8.** SEM images of NiSe<sub>2</sub> NTAs by cathodic deposition for 10 min.

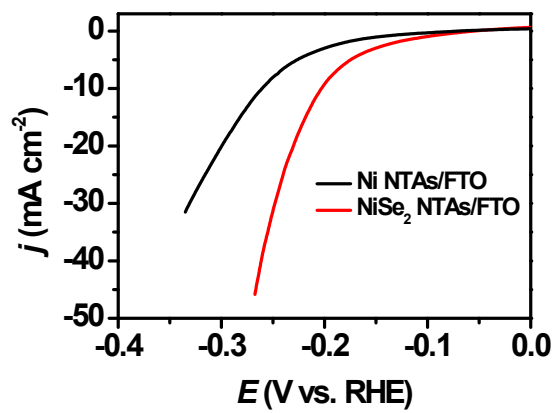

**Figure S9.** LSV curves for HER on Ni NTAs and NiSe<sub>2</sub> NTAs at an FTO substrate.

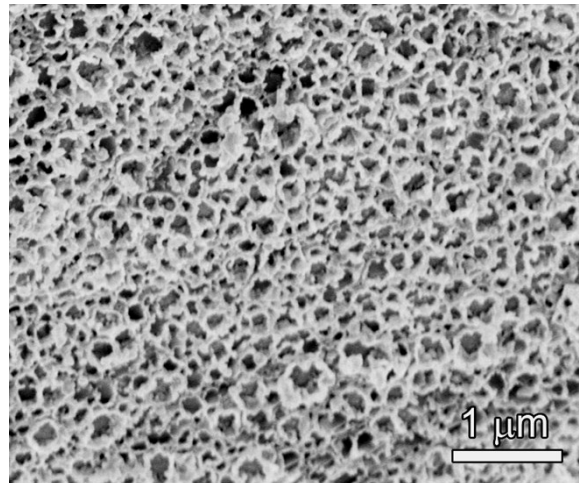

**Figure S10.** SEM image of NiSe<sub>2</sub> NTAs after electrolysis in 1 M KOH.

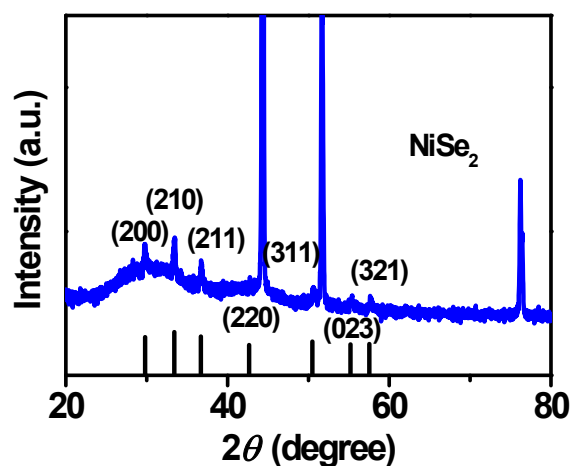

**Figure S11.** XRD pattern of NiSe<sub>2</sub> NTAs after electrolysis in 1 M KOH.

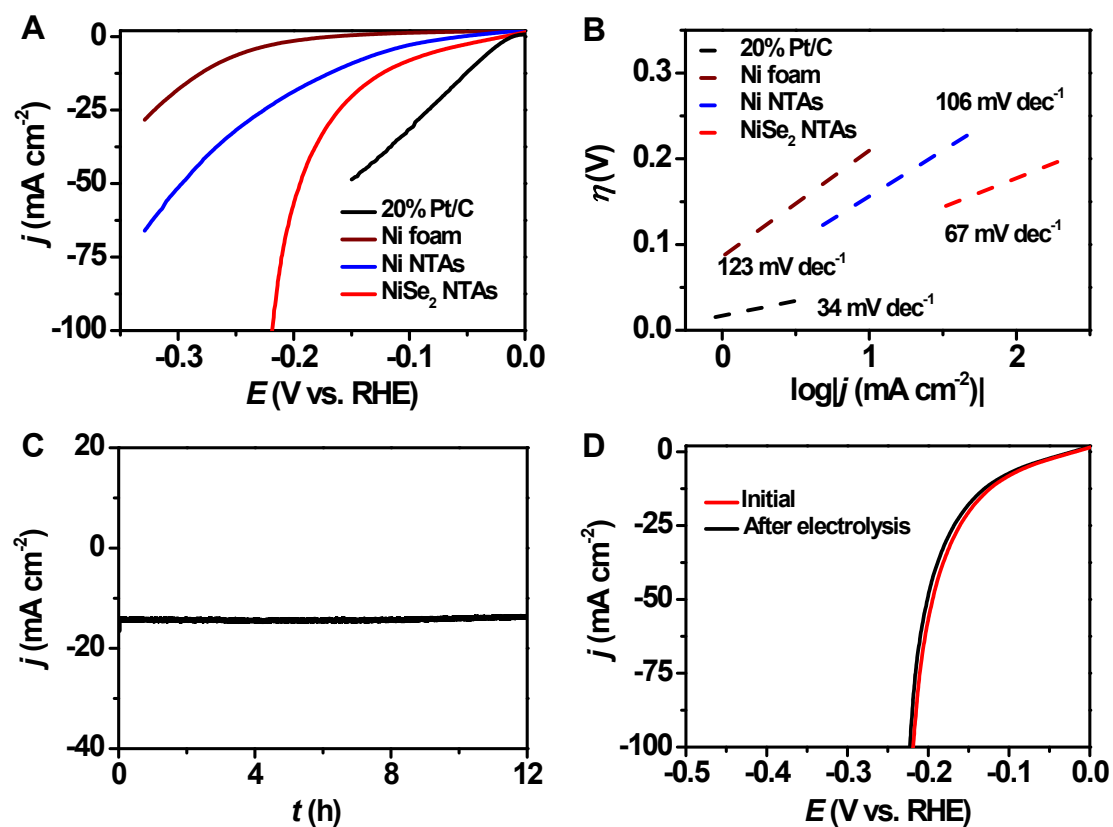

**Figure S12.** (A) Polarization curves and (B) Tafel plots for the HER on 20% Pt/C, Ni foam, Ni NTAs, and NiSe<sub>2</sub> NTAs. (C) Time-dependent current density curve of NiSe<sub>2</sub> NTAs under an overpotential of 160 mV. (D) HER polarization curves of NiSe<sub>2</sub> NTAs before and after 12 h electrolysis. All measurements were performed in 0.5 M H<sub>2</sub>SO<sub>4</sub>.

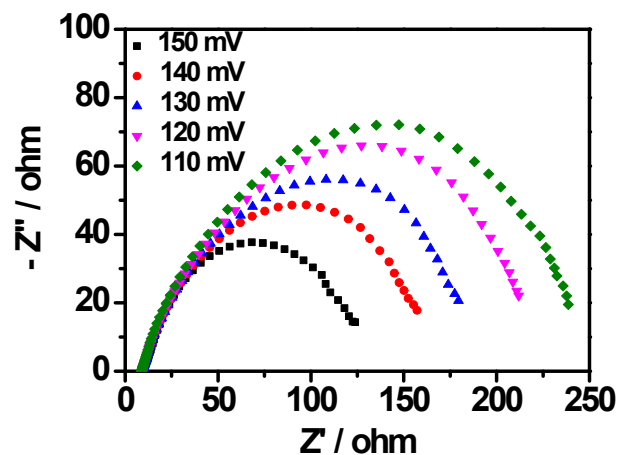

**Figure S13.** Nyquist plots of the NiSe<sub>2</sub> NTAs at various overpotentials in 1M KOH.

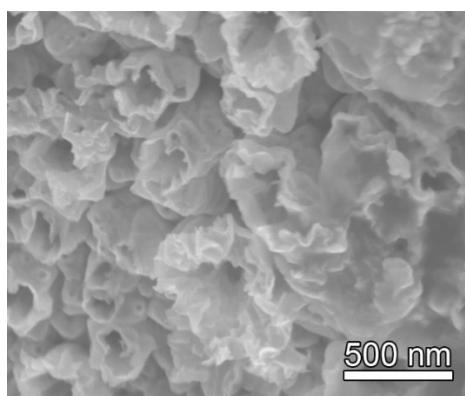

**Figure S14.** The cross-sectional SEM image of NiFeO<sub>x</sub> NTAs.

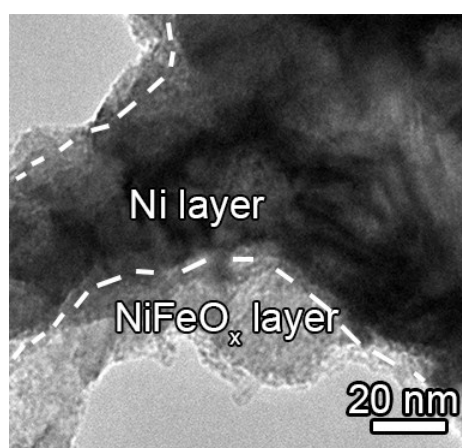

**Figure S15.** TEM image of scraped NiFeO<sub>x</sub> NTAs. We note that NiFeO<sub>x</sub> layer is uneven and its thickness ranges from a few nanometers to tens of nanometers.

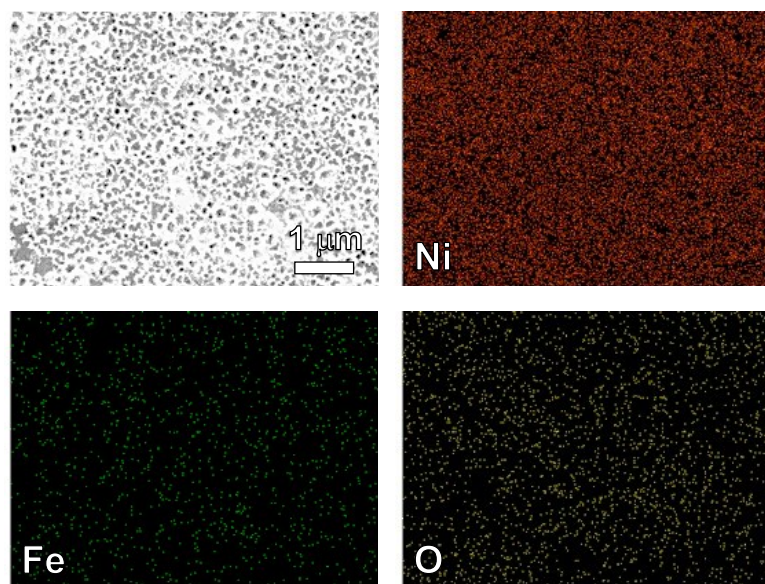

**Figure S16.** SEM mapping images of NiFeO<sub>x</sub> NTAs.

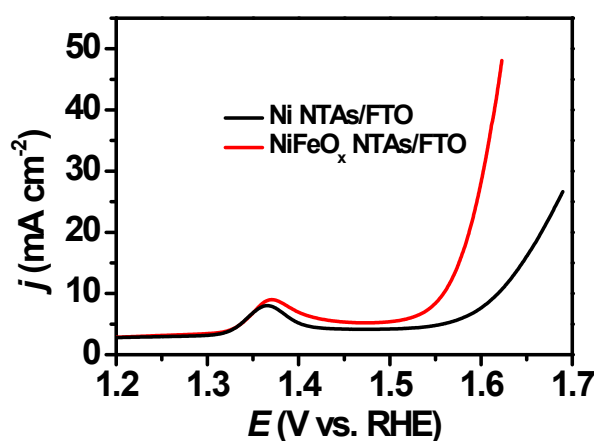

**Figure S17.** LSV curves of Ni NTAs and NiFeO<sub>x</sub> NTAs at the FTO substrate.

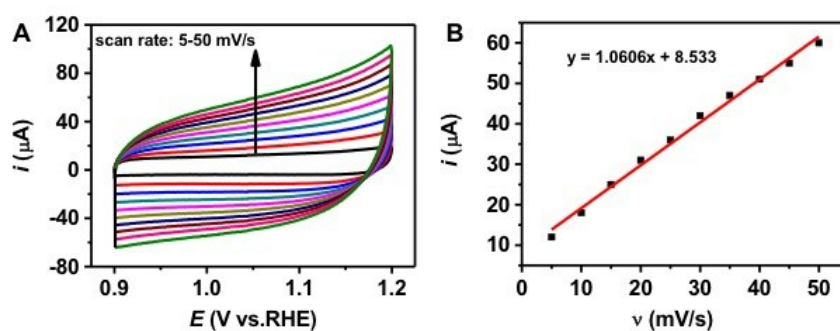

**Figure S18.** (A) Capacitive charging currents of the NiFeO<sub>x</sub> NTAs electrode recorded in the non-Faradaic potential region between 0.9 V - 1.2 V at scan rates from 5 to 50 mV/s at an interval of 5 mV. (B) The anodic charging currents measured at 1.05 V

plotted as a function of scan rates.

$$\text{ECSA} = C_{\text{DL}}/0.040 = 1.0606/0.040 = 26.515 \text{ cm}^2$$

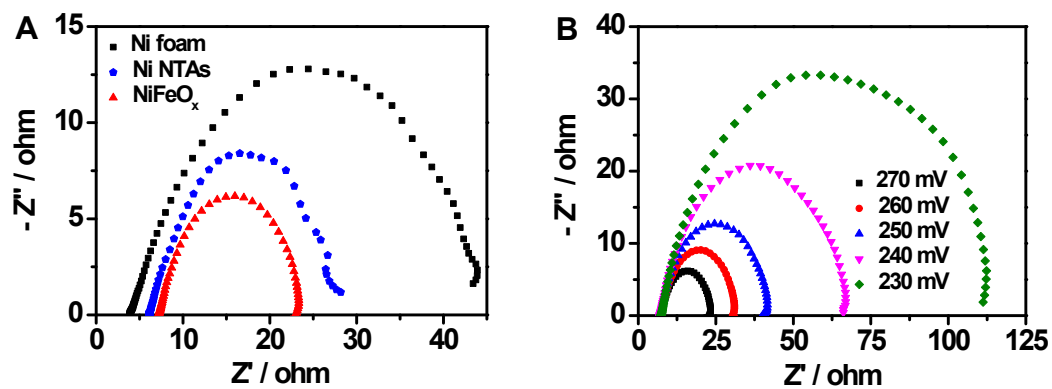

**Figure S19.** (A) Nyquist plots of Ni foil, Ni NTAs and NiFeO<sub>x</sub> NTAs in 1 M KOH.

(B) Nyquist plots of NiFeO<sub>x</sub> NTAs at various potentials in 1 M KOH.

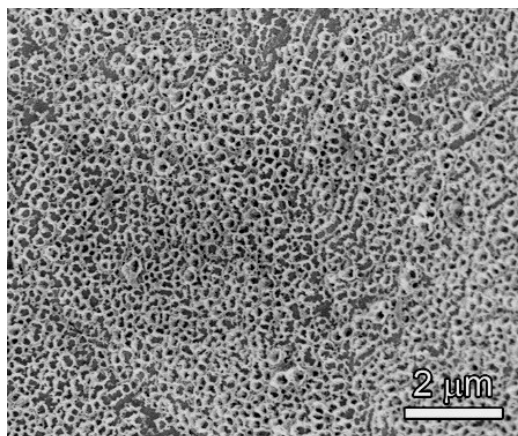

**Figure S20.** SEM image of NiFeO<sub>x</sub> NTAs after electrolysis in 1 M KOH.



**Table S1.** Comparison of catalytic performance of various 3D NiSe<sub>2</sub> catalysts.

| Catalysts                                 | Electrolyte                              | Current density<br>(mA cm <sup>-2</sup> ) | Overpotential<br>(mV) | Tafel slope<br>(mV dec <sup>-1</sup> ) | Ref.             |
|-------------------------------------------|------------------------------------------|-------------------------------------------|-----------------------|----------------------------------------|------------------|
| Porous NiSe <sub>2</sub> /NF <sup>U</sup> | 0.5 M H <sub>2</sub> SO <sub>4</sub>     | 10                                        | 143                   | 49                                     | 1                |
| Porous NiSe <sub>2</sub> /NF <sup>U</sup> | 0.5 M H <sub>2</sub> SO <sub>4</sub>     | 10                                        | 153                   | 46                                     | 2                |
| NiSe <sub>2</sub> nanosheets/CF           | 0.5 M H <sub>2</sub> SO <sub>4</sub>     | 10                                        | 117                   | 32                                     | 3                |
| NiSe <sub>2</sub> nanosheets/NF           | 0.5 M H <sub>2</sub> SO <sub>4</sub>     | 10                                        | 156                   | 54                                     | 4                |
| NiSe <sub>2</sub> nanosheets/NF           | 1.0 M KOH                                | 10                                        | 164                   | 96                                     | 4                |
| NiSe <sub>2</sub> /CFP                    | 0.5 M H <sub>2</sub> SO <sub>4</sub>     | 10                                        | 270                   | 68.8                                   | 5                |
| NiSe <sub>2</sub> nanowall/CC             | 0.5 M H <sub>2</sub> SO <sub>4</sub>     | 10                                        | 145                   | 41                                     | 6                |
| <b>NiSe<sub>2</sub> NTAs/NF</b>           | <b>0.5 M H<sub>2</sub>SO<sub>4</sub></b> | <b>10</b>                                 | <b>98</b>             | <b>67</b>                              | <b>This work</b> |
| <b>NiSe<sub>2</sub> NTAs/NF</b>           | <b>1.0 M KOH</b>                         | <b>10</b>                                 | <b>60</b>             | <b>65</b>                              | <b>This work</b> |

NF: nickel foam; CF: carbon fiber; CFP: carbon fiber paper; CC: carbon cloth.

<sup>U</sup> uncompensated *iR* correction.

**Table S2.** OER performance comparison between NiFeO<sub>x</sub> NTAs electrode and published well-known OER systems.

| Catalysts                                 | Electrolyte<br>(KOH) | Onset<br>overpotential(mV) | $j @ \eta = 300$<br>mV (mA cm <sup>-2</sup> ) | Tafel slope<br>(mV dec <sup>-1</sup> ) | Ref.             |
|-------------------------------------------|----------------------|----------------------------|-----------------------------------------------|----------------------------------------|------------------|
| Fe:Ni(OH) <sub>2</sub> /NF                | 1.0 M                | 215                        | 750                                           | 42                                     | 7                |
| NiFeO <sub>x</sub> /IF                    | 1.0 M                | 220                        | 1000                                          | 34                                     | 8                |
| NiFe foam <sup>U</sup>                    | 1.0 M                | 240                        | 80                                            | 56                                     | 9                |
| NiFe/NiCo <sub>2</sub> O <sub>4</sub> /NF | 1.0 M                | 240                        | 280                                           | 39                                     | 10               |
| NiCo <sub>2</sub> S <sub>4</sub> /NF      | 1.0 M                | 240                        | 20                                            | 40                                     | 11               |
| Ni <sub>2</sub> Se <sub>3</sub> /NF       | 1.0 M                | 230                        | 50                                            | 144                                    | 12               |
| <b>NiFeO<sub>x</sub></b>                  | <b>1.0 M</b>         | <b>230</b>                 | <b>400</b>                                    | <b>47</b>                              | <b>This work</b> |
| <b>NTAs/NF</b>                            |                      |                            |                                               |                                        |                  |

IF: iron foam; LDH: layered double hydroxide.

<sup>U</sup> uncompensated  $iR$  correction.

**Table S3.** Comparison of overall water splitting performance in 1.0 M KOH for NiFeO<sub>x</sub> NTAs||NiSe<sub>2</sub> NTAs with other non-noble-metal electrocatalysts.

| Catalyst couples                                                                           | Current density<br>(mA cm <sup>-2</sup> ) | Cell voltage<br>(V) | Ref.             |
|--------------------------------------------------------------------------------------------|-------------------------------------------|---------------------|------------------|
| Pt  IrO <sub>2</sub>                                                                       | 10                                        | 1.67                | 13               |
| RuO <sub>2</sub>   Pt/C                                                                    | 10                                        | 1.53                | 14               |
| Ni <sub>2.5</sub> Co <sub>0.5</sub> Fe-LDH  <br>Ni <sub>2.5</sub> Co <sub>0.5</sub> Fe-LDH | 10                                        | 1.62                | 15               |
| Co-P/NC   Co-P/NC                                                                          | 10                                        | 1.7                 | 13               |
| MoO <sub>2</sub> nanosheets  <br>MoO <sub>2</sub> nanosheets                               | 10                                        | 1.53                | 16               |
| CoO <sub>x</sub> @CN  CoO <sub>x</sub> @CN                                                 | 20                                        | 1.55                | 17               |
| NiFeO <sub>x</sub>   NiFe-P                                                                | 20                                        | 1.6                 | 8                |
| <b>NiFeO<sub>x</sub> NTAs  NiSe<sub>2</sub> NTAs</b>                                       | <b>50</b>                                 | <b>1.53</b>         | <b>This work</b> |

## Supplementary References

- 1 H. Zhou; Y. Wang; R. He; F. Yu; J. Sun; F. Wang; Y. Lan; Z. Ren; S. Chen, *Nano Energy*, 2016, **20**, 29-36.
- 2 H. Zhou; F. Yu; Y. Liu; J. Sun; Z. Zhu; R. He; J. Bao; W. A. Goddard; S. Chen; Z. Ren, *Energy Environ. Sci.*, 2017, **10**, 1487-1492.
- 3 F. Wang; Y. Li; T. A. Shifa; K. Liu; F. Wang; Z. Wang; P. Xu; Q. Wang; J. He, *Angew. Chem., Int. Ed.*, 2016, **55**, 6919-24.
- 4 Y. Ge; S.-P. Gao; P. Dong; R. Baines; P. M. Ajayan; M. Ye; J. Shen, *Nanoscale*, 2017, **9**, 5538-5544.
- 5 L. Zhang; T. Wang; L. Sun; Y. Sun; T. Hu; K. Xu; F. Ma, *J. Mater. Chem. A*, 2017, **5**, 19752-19759.
- 6 C. Tang; L. Xie; X. Sun; A. M. Asiri; Y. He, *Nanotechnology*, 2016, **27**, 20LT02.
- 7 W. Zhang; J. Qi; K. Liu; R. Cao, *Adv. Energy Mater.*, 2016, **6**, 1502489.
- 8 J. Wang; L. Ji; S. Zuo; Z. Chen, *Adv. Energy Mater.*, 2017, **7**, 1700107.
- 9 Y. Liang; Q. Liu; A. M. Asiri; X. Sun; Y. He, *Int. J. Hydrogen Energy*, 2015, **40**, 13258-13263.
- 10 C. Xiao; Y. Li; X. Lu; C. Zhao, *Adv. Funct. Mater.*, 2016, **26**, 3515-3523.
- 11 A. Sivanantham; P. Ganesan; S. Shanmugam, *Adv. Funct. Mater.*, 2016, **26**, 4661-4672.
- 12 R. Xu; R. Wu; Y. Shi; J. Zhang; B. Zhang, *Nano Energy*, 2016, **24**, 103-110.
- 13 B. You; N. Jiang; M. Sheng; S. Gul; J. Yano; Y. Sun, *Chem. Mat.*, 2015, **27**, 7636-

7642.

14 Z. Pu; Y. Luo; A. M. Asiri; X. Sun, *ACS Appl. Mater. Interfaces*, 2016, **8**, 4718-4723.

15 X. Zhu; C. Tang; H.-F. Wang; B.-Q. Li; Q. Zhang; C. Li; C. Yang; F. Wei, *J. Mater. Chem. A*, 2016, **4**, 7245-7250.

16 Y. Jin; H. Wang; J. Li; X. Yue; Y. Han; P. K. Shen; Y. Cui, *Adv. Mater.*, 2016, **28**, 3785-3790.

17 X. Gao; H. Zhang; Q. Li; X. Yu; Z. Hong; X. Zhang; C. Liang; Z. Lin, *Angew. Chem., Int. Ed.*, 2016, **55**, 6290-6294.
